# Supplementary material for: PI3KC2α-dependent and VPS34-independent generation of PI3P controls primary cilium-mediated autophagy in response to shear stress
Source: PubMed Central journal article supplement (PMC6962367; doi:10.1038/s41467-019-14086-1), 2020-01-15
Supplement: 41467_2019_14086_MOESM3_ESM.pdf [file 41467_2019_14086_MOESM3_ESM.pdf]

## Reporting Summary

Nature Research wishes to improve the reproducibility of the work that we publish. This form provides structure for consistency and transparency in reporting. For further information on Nature Research policies, see [Authors & Referees](#) and the [Editorial Policy Checklist](#).

### Statistics

For all statistical analyses, confirm that the following items are present in the figure legend, table legend, main text, or Methods section.

n/a Confirmed

- The exact sample size ( $n$ ) for each experimental group/condition, given as a discrete number and unit of measurement
- A statement on whether measurements were taken from distinct samples or whether the same sample was measured repeatedly
- The statistical test(s) used AND whether they are one- or two-sided  
*Only common tests should be described solely by name; describe more complex techniques in the Methods section.*
- A description of all covariates tested
- A description of any assumptions or corrections, such as tests of normality and adjustment for multiple comparisons
- A full description of the statistical parameters including central tendency (e.g. means) or other basic estimates (e.g. regression coefficient) AND variation (e.g. standard deviation) or associated estimates of uncertainty (e.g. confidence intervals)
- For null hypothesis testing, the test statistic (e.g.  $F$ ,  $t$ ,  $r$ ) with confidence intervals, effect sizes, degrees of freedom and  $P$  value noted  
*Give  $P$  values as exact values whenever suitable.*
- For Bayesian analysis, information on the choice of priors and Markov chain Monte Carlo settings
- For hierarchical and complex designs, identification of the appropriate level for tests and full reporting of outcomes
- Estimates of effect sizes (e.g. Cohen's  $d$ , Pearson's  $r$ ), indicating how they were calculated

*Our web collection on [statistics for biologists](#) contains articles on many of the points above.*

### Software and code

Policy information about [availability of computer code](#)

Data collection

ImageLab (BioRad), Zen (Zeiss)

Data analysis

Excel (windows), GraphPad PRISM7, Zen LITE (Zeiss), IMARIS (BitPlane), Fiji

For manuscripts utilizing custom algorithms or software that are central to the research but not yet described in published literature, software must be made available to editors/reviewers. We strongly encourage code deposition in a community repository (e.g. GitHub). See the Nature Research [guidelines for submitting code & software](#) for further information.

### Data

Policy information about [availability of data](#)

All manuscripts must include a [data availability statement](#). This statement should provide the following information, where applicable:

- Accession codes, unique identifiers, or web links for publicly available datasets
- A list of figures that have associated raw data
- A description of any restrictions on data availability

the data that support the findings of this study are available from the corresponding author(s) upon reasonable request.

### Field-specific reporting

Please select the one below that is the best fit for your research. If you are not sure, read the appropriate sections before making your selection.

- Life sciences       Behavioural & social sciences       Ecological, evolutionary & environmental sciences

For a reference copy of the document with all sections, see [nature.com/documents/nr-reporting-summary-flat.pdf](https://www.nature.com/documents/nr-reporting-summary-flat.pdf)

## Life sciences study design

All studies must disclose on these points even when the disclosure is negative.

|                 |                                                                                                             |
|-----------------|-------------------------------------------------------------------------------------------------------------|
| Sample size     | no sample size calculation was needed                                                                       |
| Data exclusions | no data exclusion size calculation was required.                                                            |
| Replication     | all measures were from n=3 independant experiments (minimum) and all attempts to replicate were successful. |
| Randomization   | N/A                                                                                                         |
| Blinding        | N/A                                                                                                         |

## Reporting for specific materials, systems and methods

We require information from authors about some types of materials, experimental systems and methods used in many studies. Here, indicate whether each material, system or method listed is relevant to your study. If you are not sure if a list item applies to your research, read the appropriate section before selecting a response.

### Materials & experimental systems

|                                     |                                                                 |
|-------------------------------------|-----------------------------------------------------------------|
| n/a                                 | Involvement in the study                                        |
| <input type="checkbox"/>            | <input checked="" type="checkbox"/> Antibodies                  |
| <input type="checkbox"/>            | <input checked="" type="checkbox"/> Eukaryotic cell lines       |
| <input checked="" type="checkbox"/> | <input type="checkbox"/> Palaeontology                          |
| <input type="checkbox"/>            | <input checked="" type="checkbox"/> Animals and other organisms |
| <input checked="" type="checkbox"/> | <input type="checkbox"/> Human research participants            |
| <input checked="" type="checkbox"/> | <input type="checkbox"/> Clinical data                          |

### Methods

|                                     |                                                 |
|-------------------------------------|-------------------------------------------------|
| n/a                                 | Involvement in the study                        |
| <input checked="" type="checkbox"/> | <input type="checkbox"/> ChIP-seq               |
| <input checked="" type="checkbox"/> | <input type="checkbox"/> Flow cytometry         |
| <input checked="" type="checkbox"/> | <input type="checkbox"/> MRI-based neuroimaging |

## Antibodies

|                 |                                                                                                                                                                                                                                                                                                                                                                                                                                                                                                                                                                                                                                                                                                                                                                                                                                                                                                                                                                                                                   |
|-----------------|-------------------------------------------------------------------------------------------------------------------------------------------------------------------------------------------------------------------------------------------------------------------------------------------------------------------------------------------------------------------------------------------------------------------------------------------------------------------------------------------------------------------------------------------------------------------------------------------------------------------------------------------------------------------------------------------------------------------------------------------------------------------------------------------------------------------------------------------------------------------------------------------------------------------------------------------------------------------------------------------------------------------|
| Antibodies used | rabbit-anti LC3 (Sigma, Cat#L7543); mouse-anti-actin (Millipore, Cat#1501); mouse-anti-Beclin1 (BD Biosciences, Cat#612113); rabbit-anti-IFT88 (Proteintech, Cat#13967-1-AP); rabbit-anti-PIK3C2 $\alpha$ (Novus, Cat#NBP2-19829); mouse-anti-Wipi2 (2A2) (AbD Serotec, Cat#MCA5780GA); rabbit-anti-Rab11 (Cell Signaling, Cat#2413S); rabbit-anti-VPS34 (d9A5) (Cell Signaling, Cat#4263); rabbit-anti-LKB1 (Cell signaling, Cat#3050). mouse-anti-LC3B (MBL, Cat# M152-3); mouse-anti-ARL13B (C-5) (Santa Cruz, Cat#515784); rabbit-anti-ARL13B (Proteintech, Cat#515784); rabbit-anti-ATG16L1 (MBL, Cat#PM040); rabbit-anti-p-AMPK (T172) (Cell signaling, Cat#2535); Phalloidin (Cat# A34055); rabbit-anti-PIK3C2A (Novus, Cat#NBP2-19829); mouse-anti-Wipi2 (2A2) (Bio-Rad, Cat#MCA5780GA); rabbit-anti- $\beta$ catenin (Cell Signaling, Cat#8480); mouse-anti- $\gamma$ -Tubulin (Sigma; Cat#T5326); rabbit-anti-LKB1 (Cell signaling, Cat#3050); mouse-anti- Rab11-GTP (New East Biosciences; Cat#26919). |
| Validation      | antibodies were used as recommended by manufacturers.                                                                                                                                                                                                                                                                                                                                                                                                                                                                                                                                                                                                                                                                                                                                                                                                                                                                                                                                                             |

## Eukaryotic cell lines

Policy information about [cell lines](#)

|                                                                   |                                       |
|-------------------------------------------------------------------|---------------------------------------|
| Cell line source(s)                                               | HK2 (ATCC)                            |
| Authentication                                                    | not authenticated                     |
| Mycoplasma contamination                                          | all tested negative for contamination |
| Commonly misidentified lines (See <a href="#">ICLAC</a> register) | N/A                                   |

## Animals and other organisms

Policy information about [studies involving animals](#); [ARRIVE guidelines](#) recommended for reporting animal research

|                    |                                                                                                                                                                                                                                                                                                                                                               |
|--------------------|---------------------------------------------------------------------------------------------------------------------------------------------------------------------------------------------------------------------------------------------------------------------------------------------------------------------------------------------------------------|
| Laboratory animals | Mus Musculus, C57Bl/6J. male, 10 weeks old.                                                                                                                                                                                                                                                                                                                   |
| Wild animals       | <i>Provide details on animals observed in or captured in the field; report species, sex and age where possible. Describe how animals were caught and transported and what happened to captive animals after the study (if killed, explain why and describe method; if released, say where and when) OR state that the study did not involve wild animals.</i> |

Field-collected samples

N/A

Ethics oversight

Mice were from the breeding facility of CREFRE (US006, Toulouse, France) and maintained under SPF conditions at the animal facility of Rangueil (Anexplo platform, US06, Toulouse, France). All animal experimental procedures were conducted in accordance with institutional guidelines on animal experimentation approved by the local ethical committee of animal care and are conformed to the guidelines from Directive 2010/63/EU of the European Parliament on the protection of animals used for scientific purposes or the NIH guideline.

Note that full information on the approval of the study protocol must also be provided in the manuscript.
